# Supplementary material for: Functional regulations between genetic alteration-driven genes and drug target genes acting as prognostic biomarkers in breast cancer
Source: PubMed Central journal article supplement (PMC9226112; doi:10.1038/s41598-022-13835-5), 2022-06-23
Supplement: 41598_2022_13835_MOESM1_ESM.pdf [file 41598_2022_13835_MOESM1_ESM.pdf]

# **Functional regulations between genetic alteration-driven genes and drug target genes acting as prognostic biomarkers in breast cancer**

Li Wang<sup>1,\$,\*</sup>, Lei Yu<sup>1,\$</sup>, Jian Shi<sup>2,\$</sup>, Feng Li<sup>1,\$</sup>, Caiyu Zhang<sup>1</sup>, Haotian Xu<sup>1</sup>, Xiangzhe Yin<sup>1</sup>, Lixia Wang<sup>1</sup>, Shihua Lin<sup>1</sup>, Litvinova Anastasiia<sup>1</sup>, Yanyan Ping<sup>1,\*</sup>, Shangwei Ning<sup>1,\*</sup>, Hongying Zhao<sup>1,\*</sup>

<sup>1</sup>College of Bioinformatics Science and Technology, Harbin Medical University, Harbin 150081, China.

<sup>2</sup>Precision Medicine Institute, The First Affiliated Hospital, Sun Yat-sen University, Guangzhou, China.

<sup>\$</sup>These authors contributed equally to this work.

## **\*Corresponding Authors:**

Hongying Zhao, College of Bioinformatics Science and Technology, Harbin Medical University, Harbin 150081, China. Tel.: 86-451-86615922, E-mail: zhaohongying@hrbmu.edu.cn;

Shangwei Ning, College of Bioinformatics Science and Technology, Harbin Medical University, Harbin 150081, China. Tel.: 86-451-86615922, E-mail: ningsw@ems.hrbmu.edu.cn;

Yanyan Ping, College of Bioinformatics Science and Technology, Harbin Medical University, Harbin 150081, China. Tel.: 86-451-86615922, E-mail: pingyanyan@hrbmu.edu.cn;

Li Wang, College of Bioinformatics Science and Technology, Harbin Medical University, Harbin 150081, China. Tel.: 86-451-86615922, wangli@hrbmu.edu.cn.

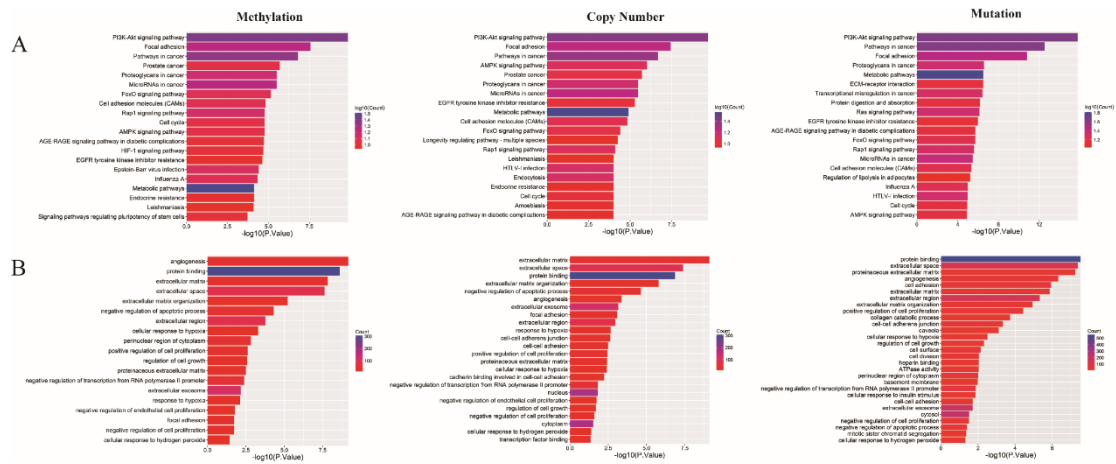

**Figure S1. Identification of biological pathways and functions in breast cancer.**

(A) Methylation, copy number, and mutation with significantly enriched pathways. (B)

Methylation, copy number, and mutation with significantly enrichment functions.

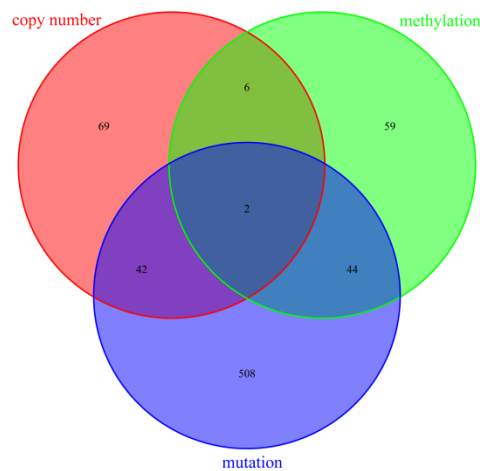

**Figure S2. Intersection diagram of genes which methylation alteration-driven,**

**CNV alteration-driven and Mutation alteration-driven.**

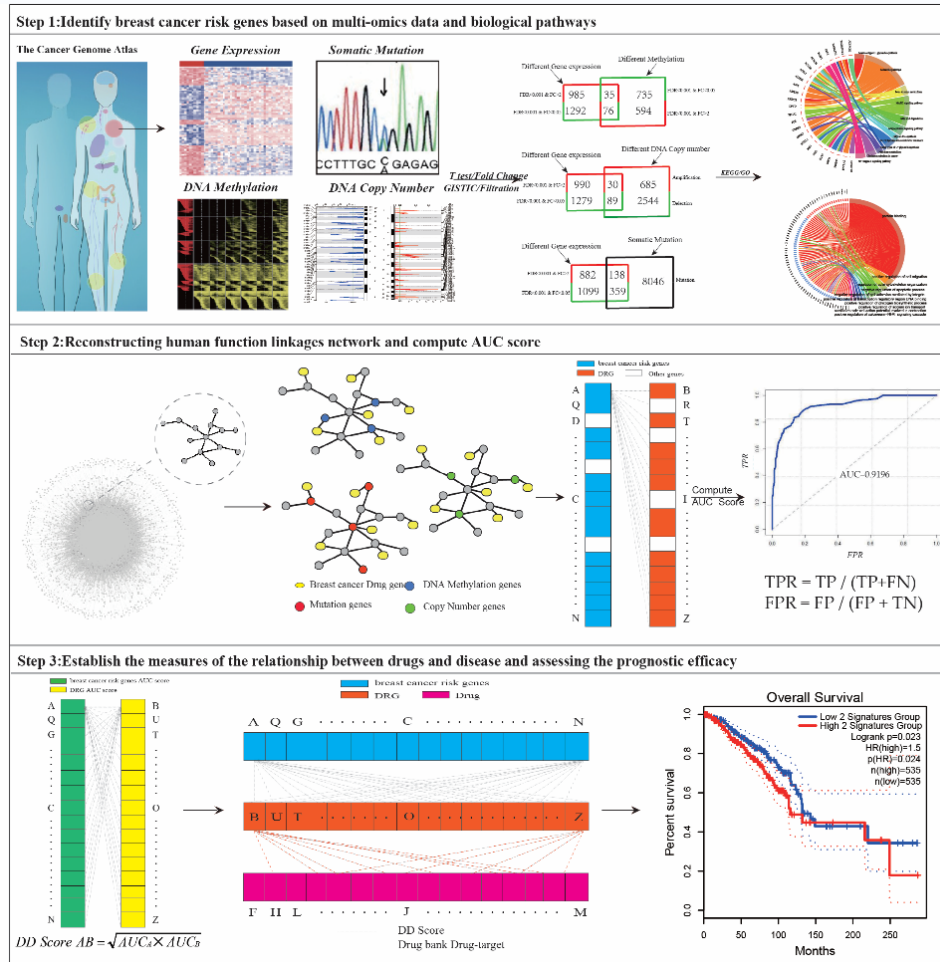

**Figure S3. Flowchart of the strategy to identify functional regulations between genetic alteration-driven genes and drug target genes.** Mapping the methylation, copy number, and mutation risk genes to the human functional linkage network. mutual predictability method was used to identified functional correlation between genetic alteration-driven genes and drug response genes in breast cancer. The potentially prognostic value of functional regulations between genetic alteration-driven genes and drug target genes were calculated.

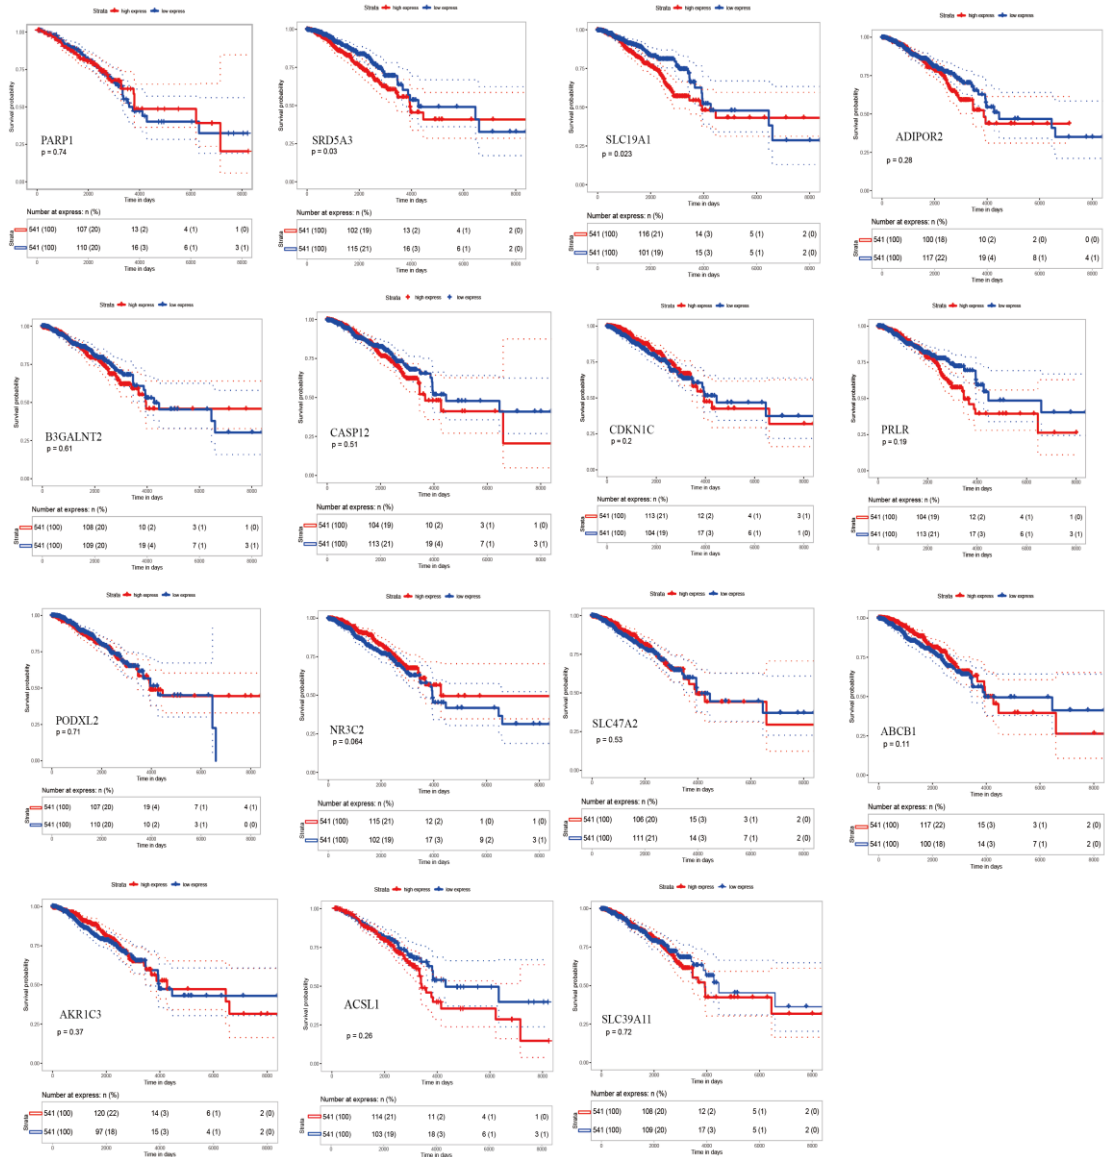

**Figure S4. Survival analysis of individual genes of genetic alteration-driven gene pairs in the TCGA cohort.** Comparison of the survival rates of two groups with respect to individual genes, which are involved in prognostic genetic alteration-driven gene pairs.
